# Supplementary material
Source: MDPI journal article supplement (https://www.mdpi.com/2304-6740/5/4/89)
Supplement: s1 [file s1]

## Supplementary data

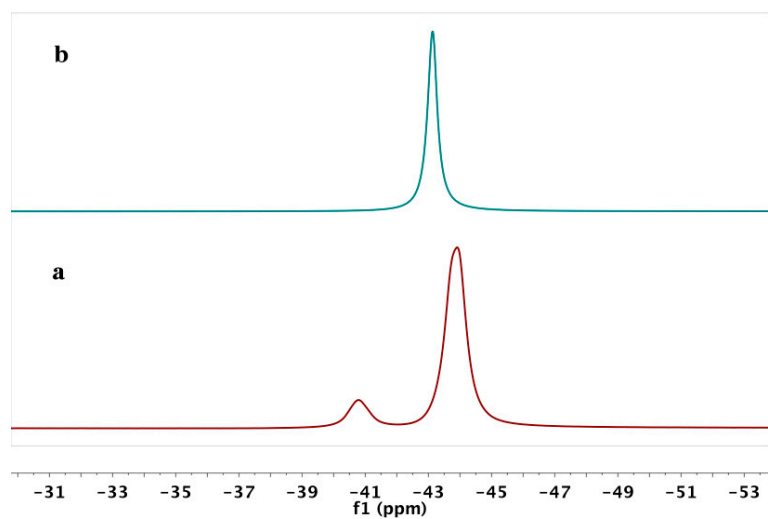

**S1** *In situ* VT MAS  $^{11}\text{B}$  NMR of  $\text{Mg}(\text{BH}_4)_2 \cdot \text{THF}$  at a) room temperature and b) 90 °C.

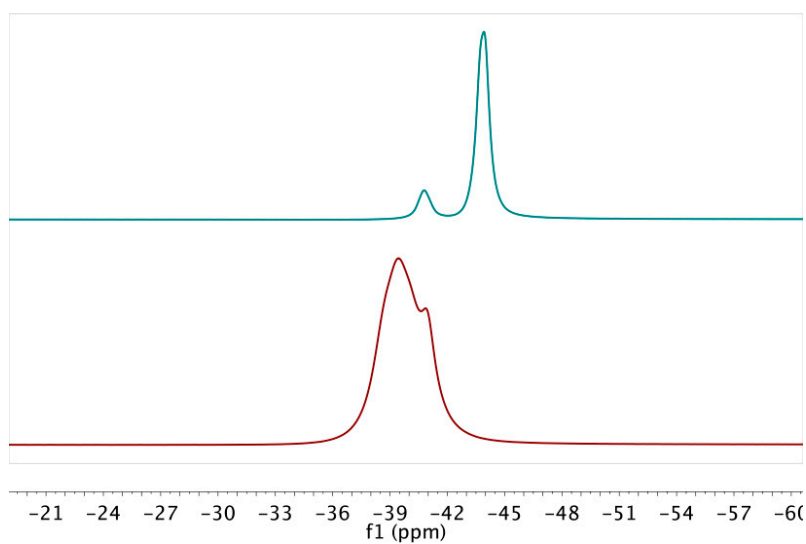

**S2**  $^{11}\text{B}$  MAS spectra of unsolvated  $\text{Mg}(\text{BH}_4)_2$  (bottom) and  $\text{Mg}(\text{BH}_4)_2 \cdot \text{THF}$
